# Supplementary material for: The role of third cation doping on phase stability, carrier transport and carrier suppression in amorphous oxide semiconductors
Source: Royal Society of Chemistry journal article supplement (doi:10.1039/d0tc02655g), 2020-01-01
Supplement: d0tc02655g1.pdf [file d0tc02655g1.pdf]

## SUPPORTING INFORMATION

The Role of Third Cation Doping on Phase Stability, Carrier Transport and Carrier Suppression  
in Amorphous Oxide Semiconductors

Austin Reed<sup>b</sup>, Chandon Stone<sup>b</sup>, Kwangdong Roh<sup>c</sup>, Han Wook Song<sup>d</sup>, Xingyu Wang<sup>a</sup>, [Mingyuan Liu<sup>a</sup>](#), Dong-Kyun Ko<sup>e</sup>, Kwangsoo No<sup>f</sup> and Sunghwan Lee<sup>a,\*</sup>

<sup>a</sup> School of Engineering Technology, Purdue University, West Lafayette, IN 47907, USA

<sup>b</sup> Department of Mechanical Engineering, Baylor University, Waco, TX 76798, USA

<sup>c</sup> Department of Electrical Engineering, Princeton University, Princeton, NJ 08544, USA

<sup>d</sup> Center for Mass and Related Quantities, Korea Research Institute of Standard and Science, Daejeon 34113, South Korea

<sup>e</sup> Department of Electrical and Computer Engineering, New Jersey Institute of Technology, Newark, NJ 07102, USA

<sup>f</sup> Department of Materials Science and Engineering, KAIST, Daejeon 34141, South Korea

Keywords: amorphous oxide semiconductors; phase stability; carrier transport; Al doping; indium oxides; InZnO

\*Corresponding authors: [sunghlee@purdue.edu](mailto:sunghlee@purdue.edu)

## EDS Measurements

X-ray energy dispersive spectroscopy (EDS) measurements to identify the concentration of a series of IAZO were made as a function of rf power (10, 20 and 30 W) for Al during co-sputtering while maintaining dc power (20 W) for IZO to incorporate Al into the IZO matrix. According to the EDS measurements, the concentration (wt.%) of Al in the IAZO films was determined to be 4, 8.9 and 16.7 wt.%.

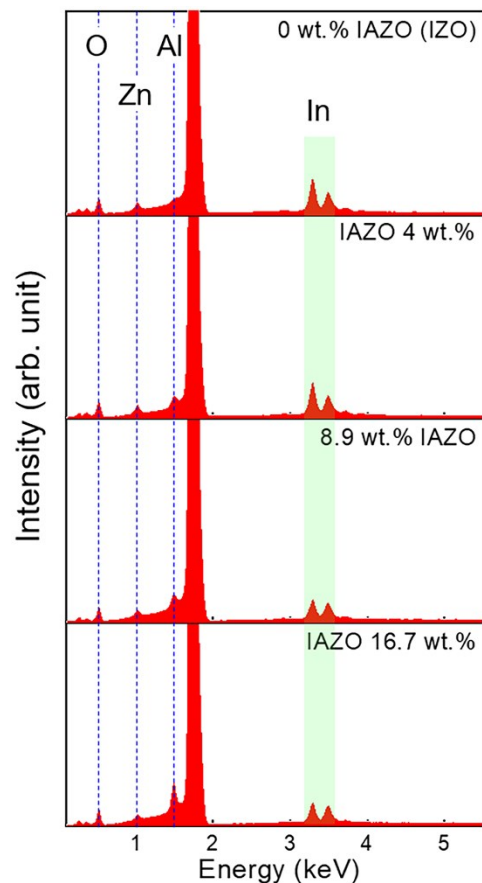

**Figure S1.** EDS elemental analysis to identify the concentration of Al in a series of IAZO films.
